# Supplementary material
Source: Royal Society of Chemistry journal article supplement (doi:10.1039/d5cp03734d)

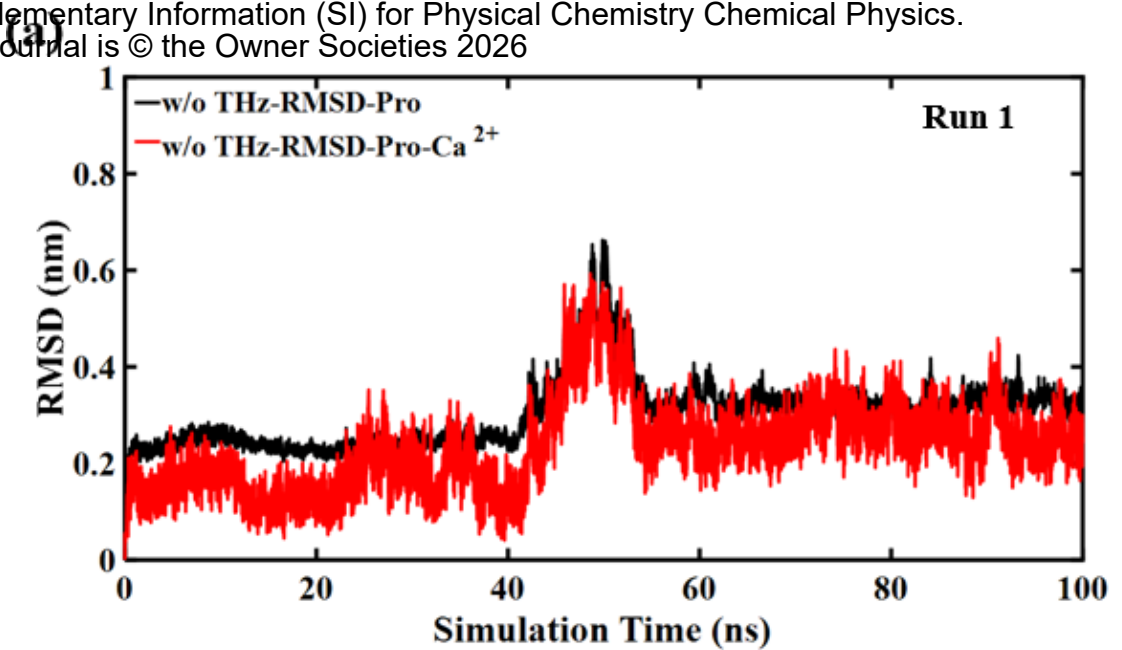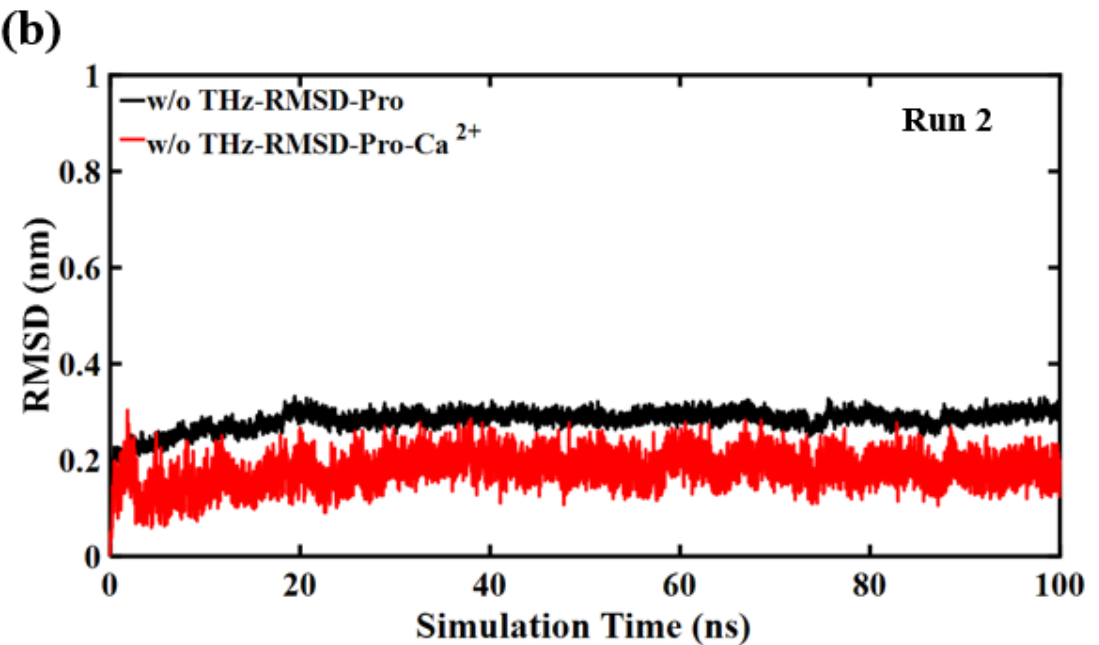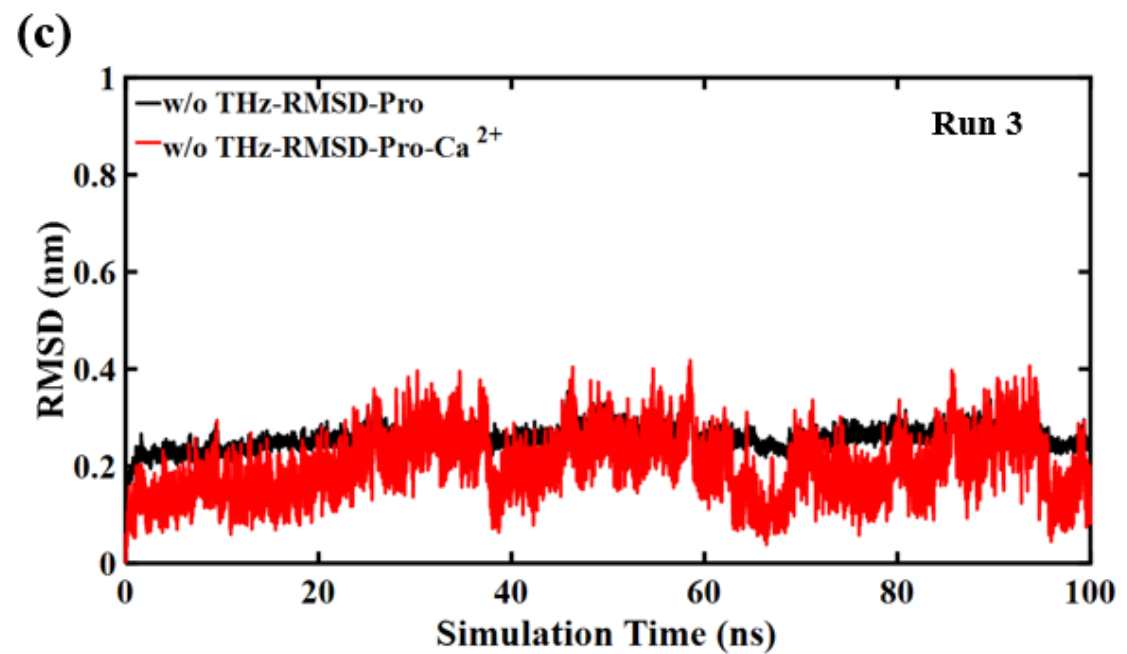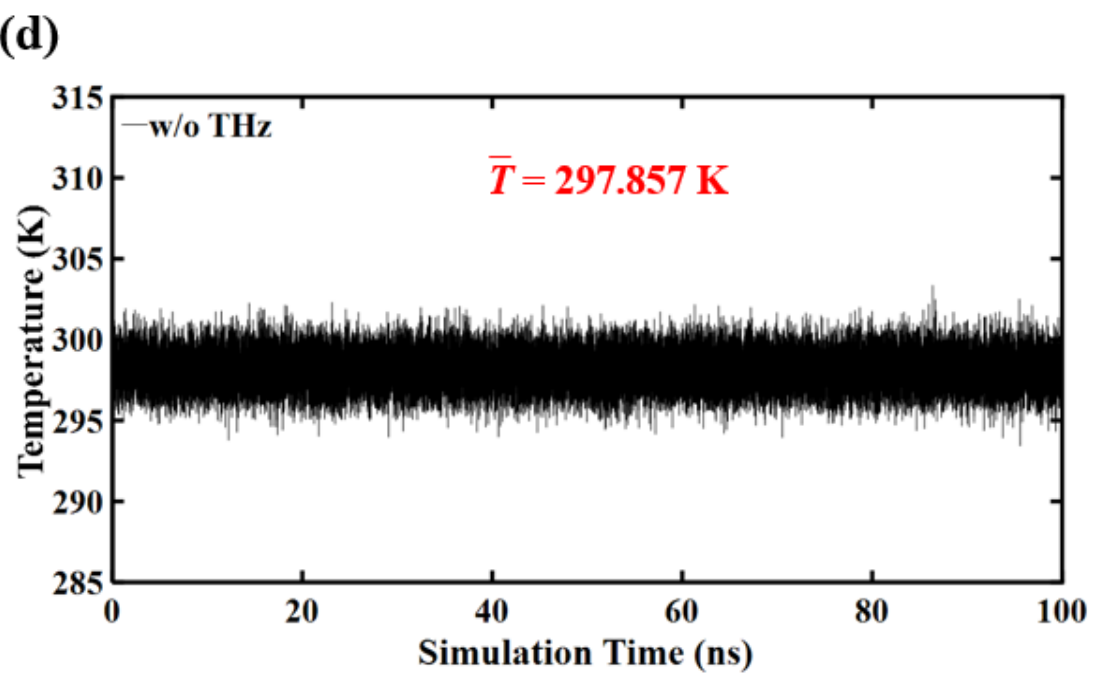

Supplement: d5cp03734d2.pdf [file d5cp03734d2.pdf]

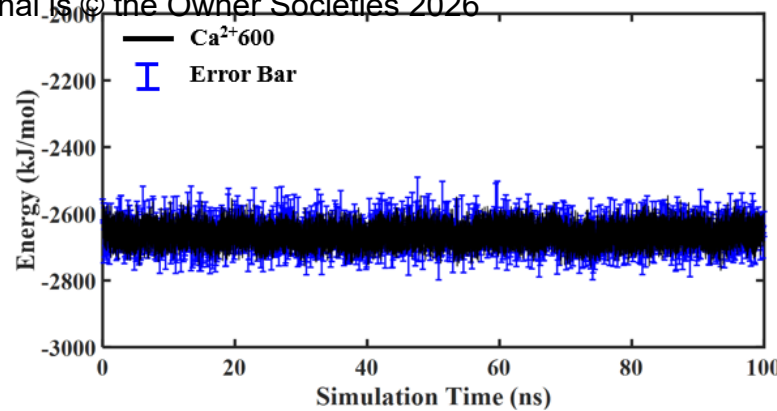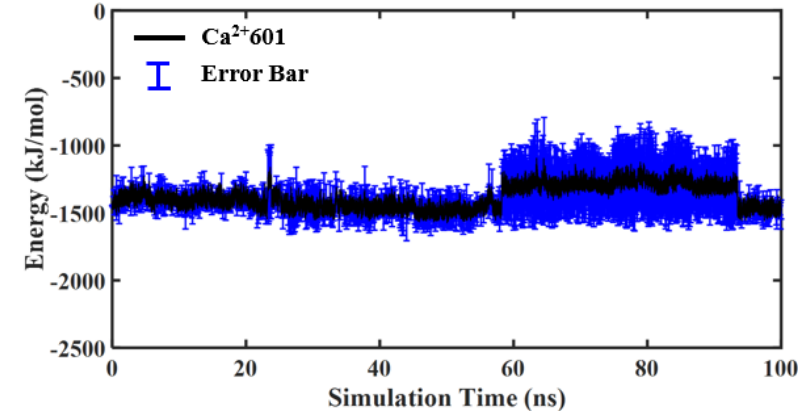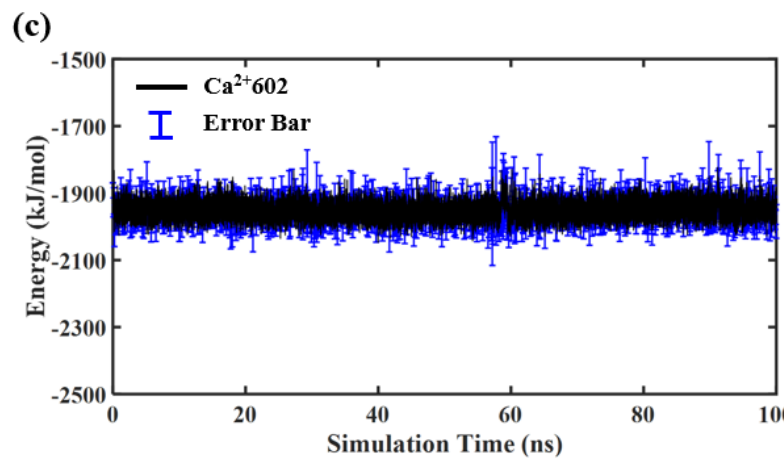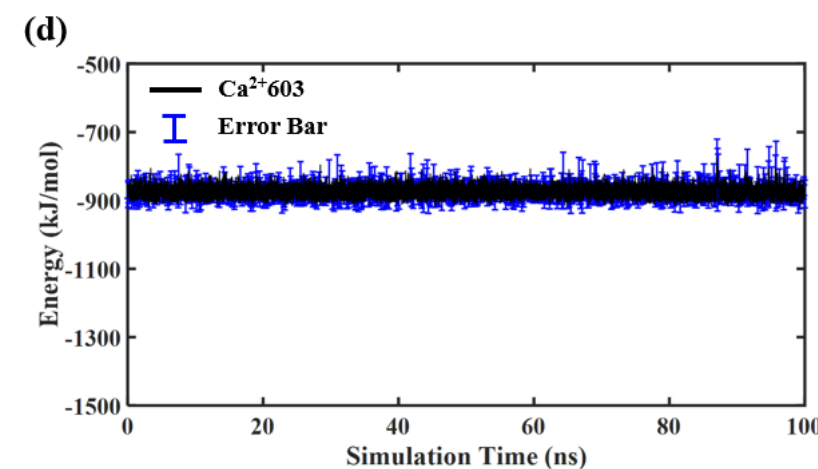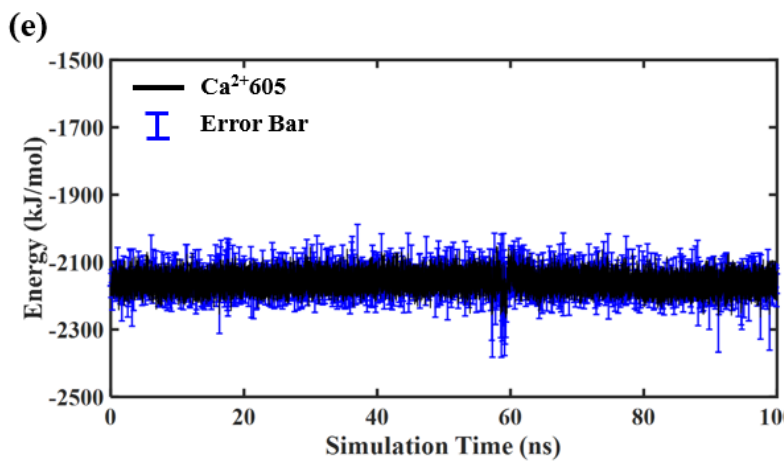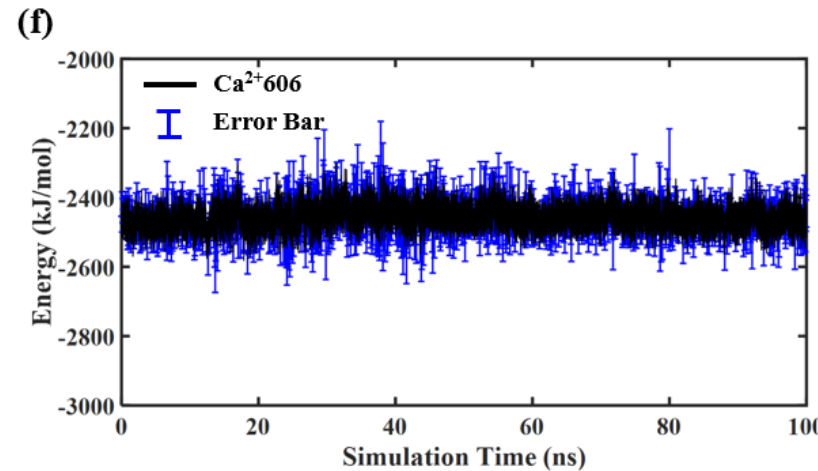

Supplement: d5cp03734d3.pdf [file d5cp03734d3.pdf]

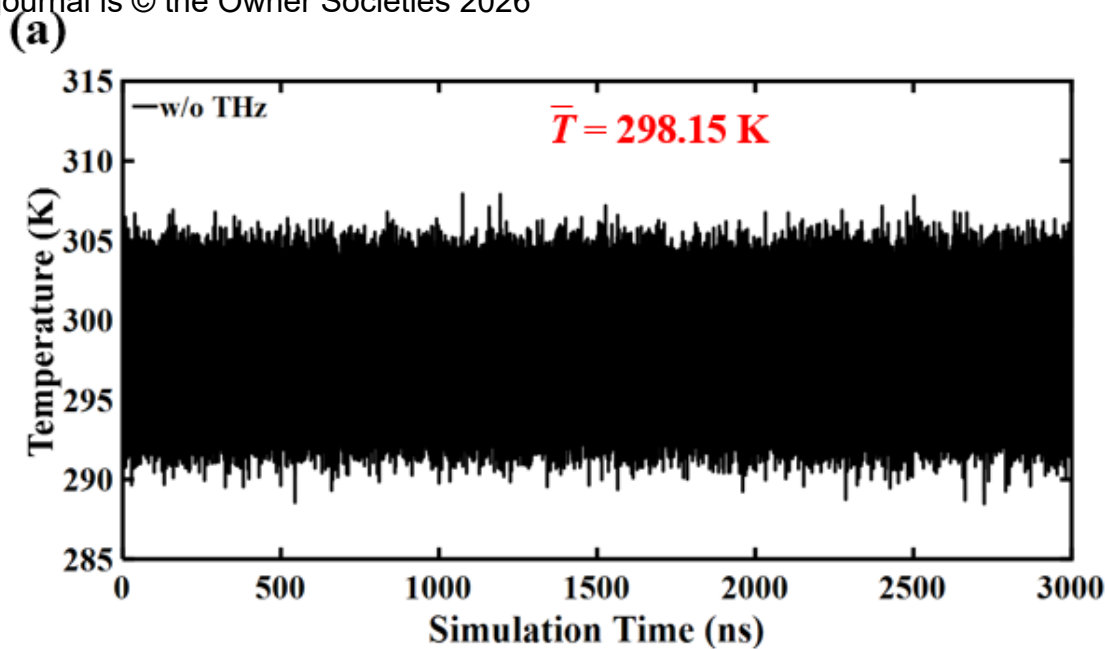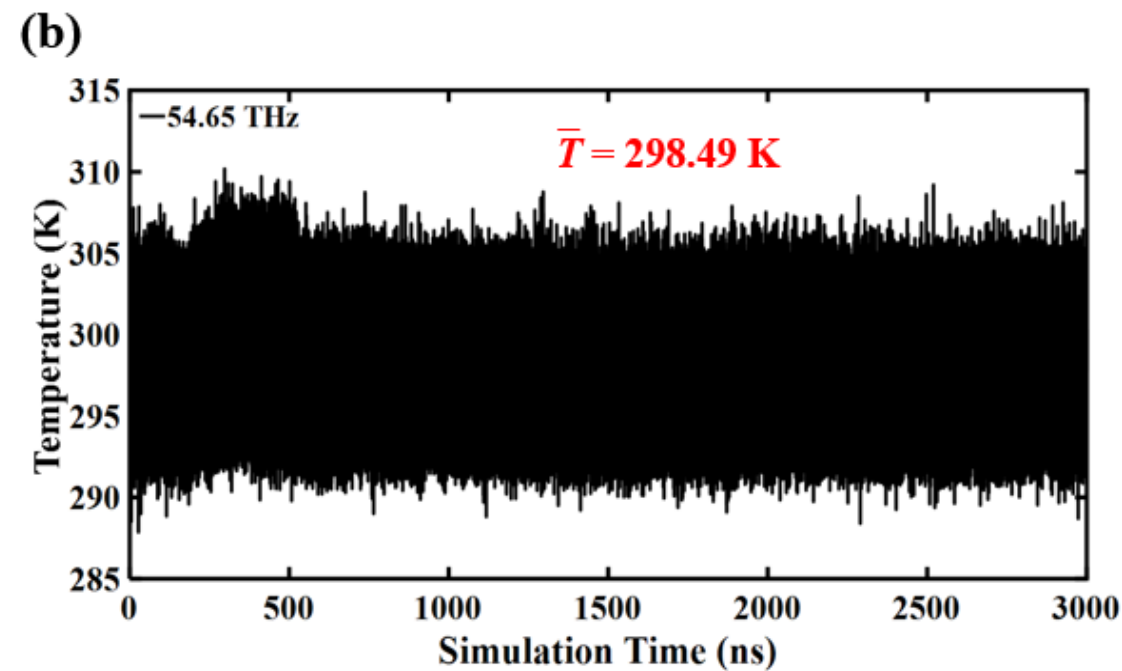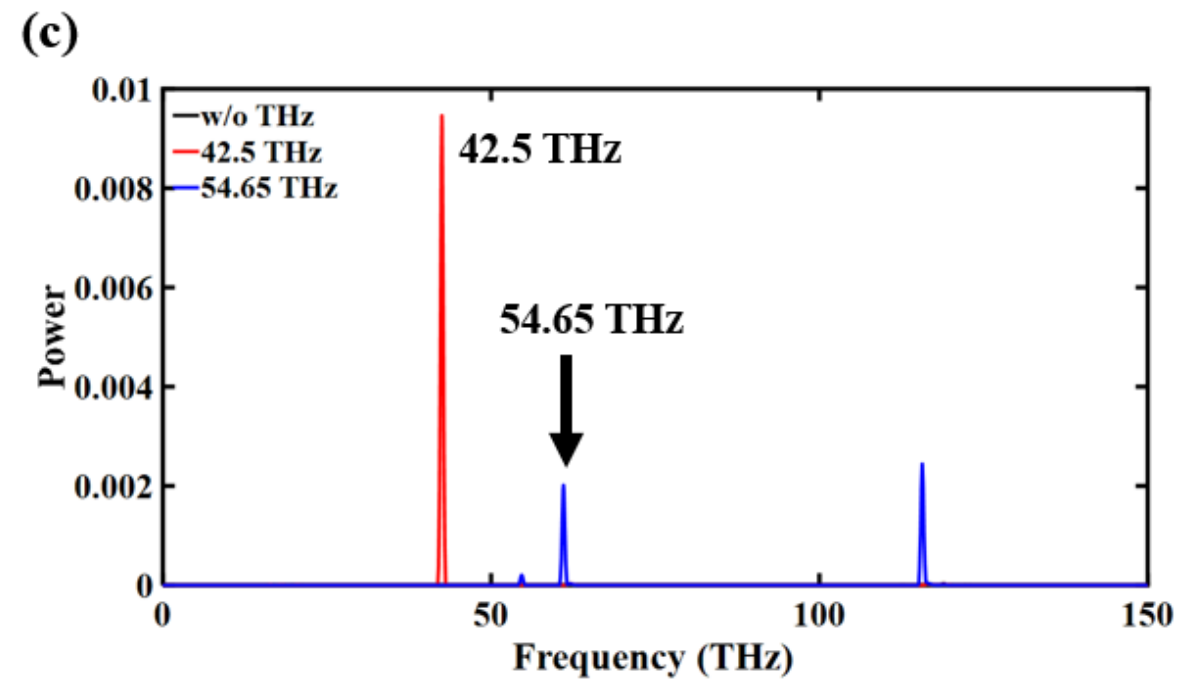

Supplement: d5cp03734d4.pdf [file d5cp03734d4.pdf]

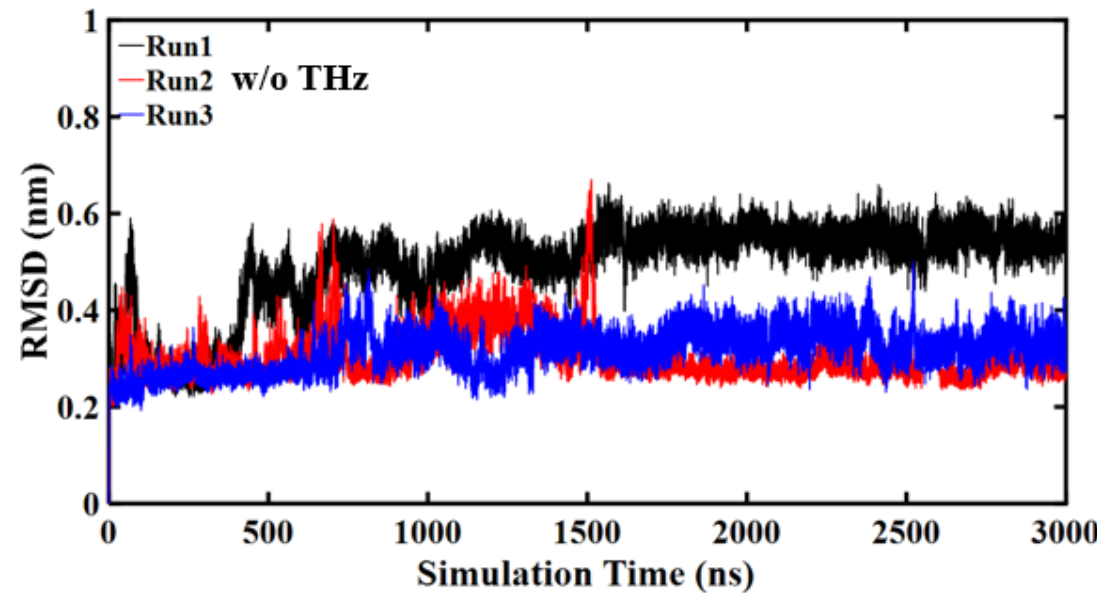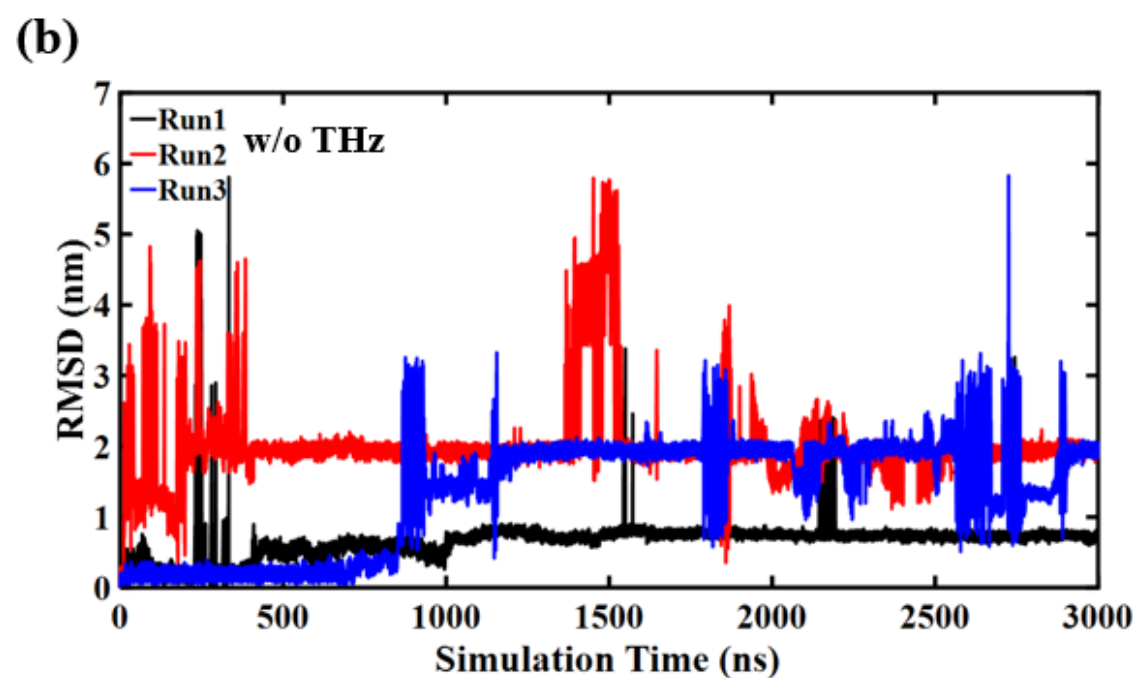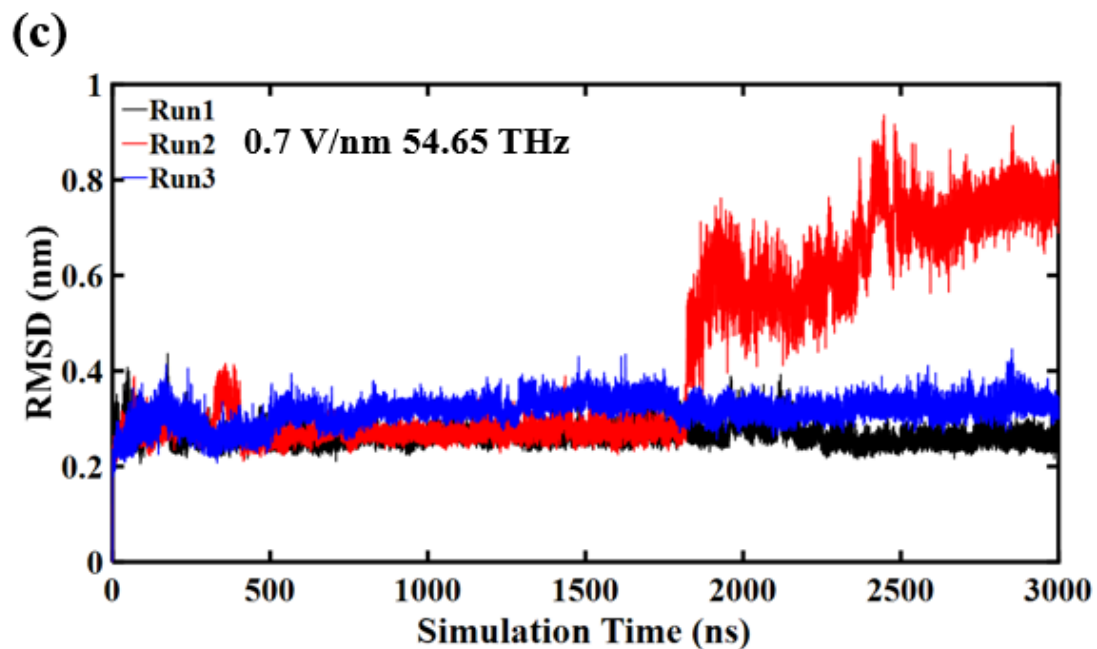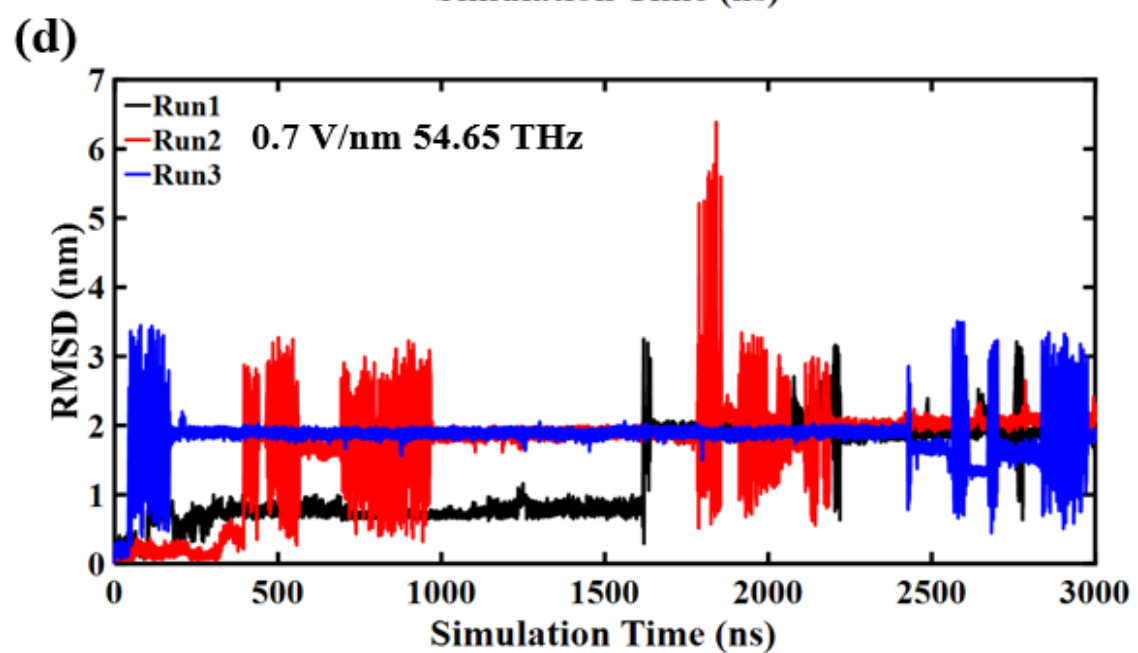

Supplement: d5cp03734d5.pdf [file d5cp03734d5.pdf]

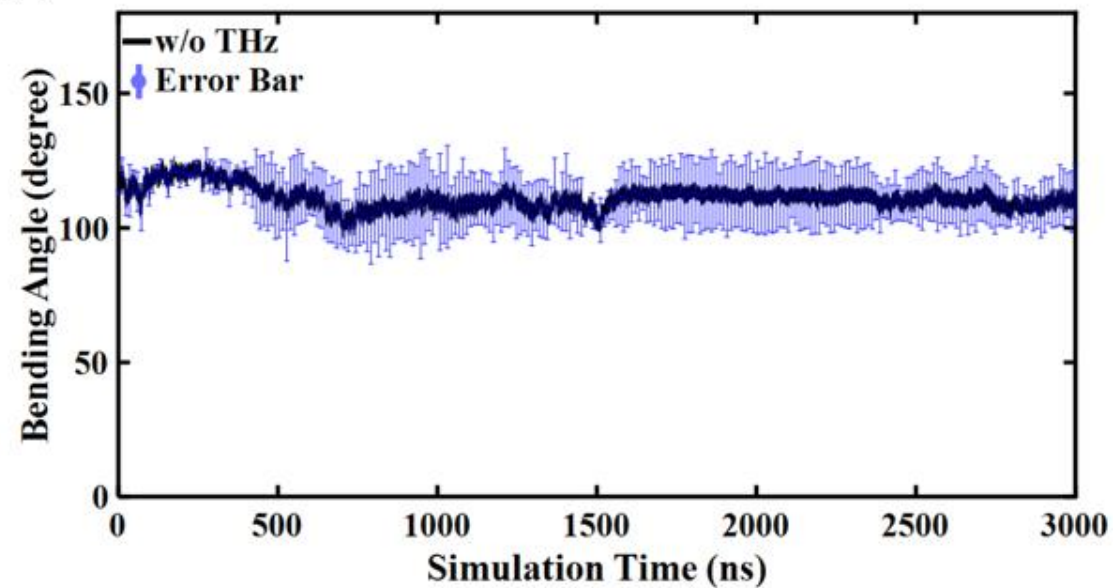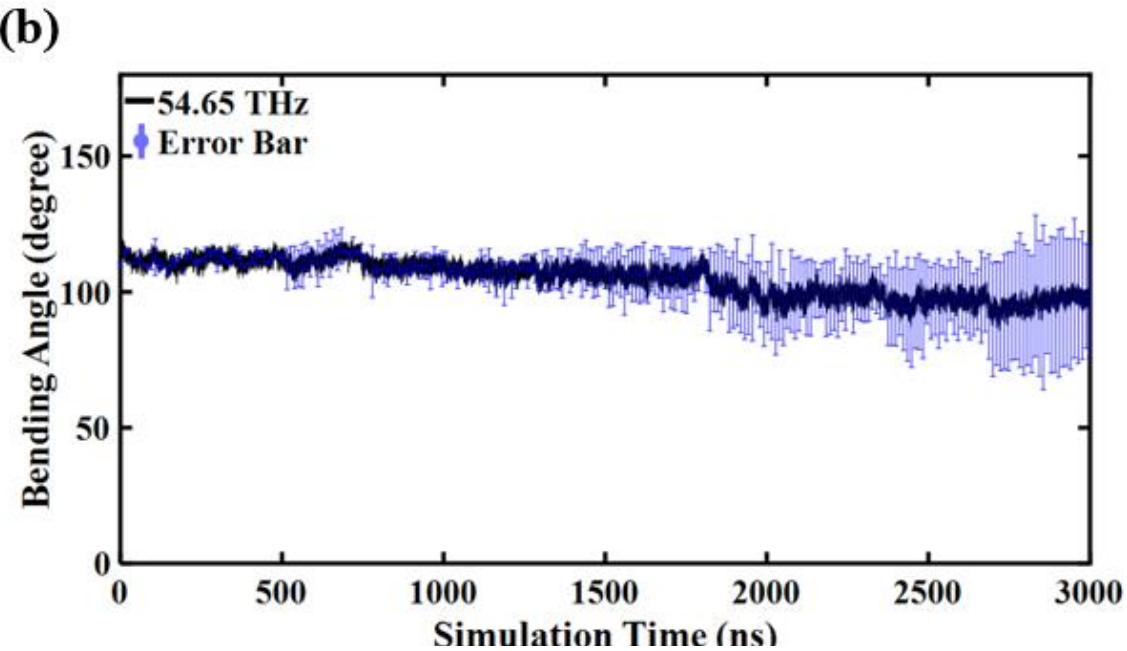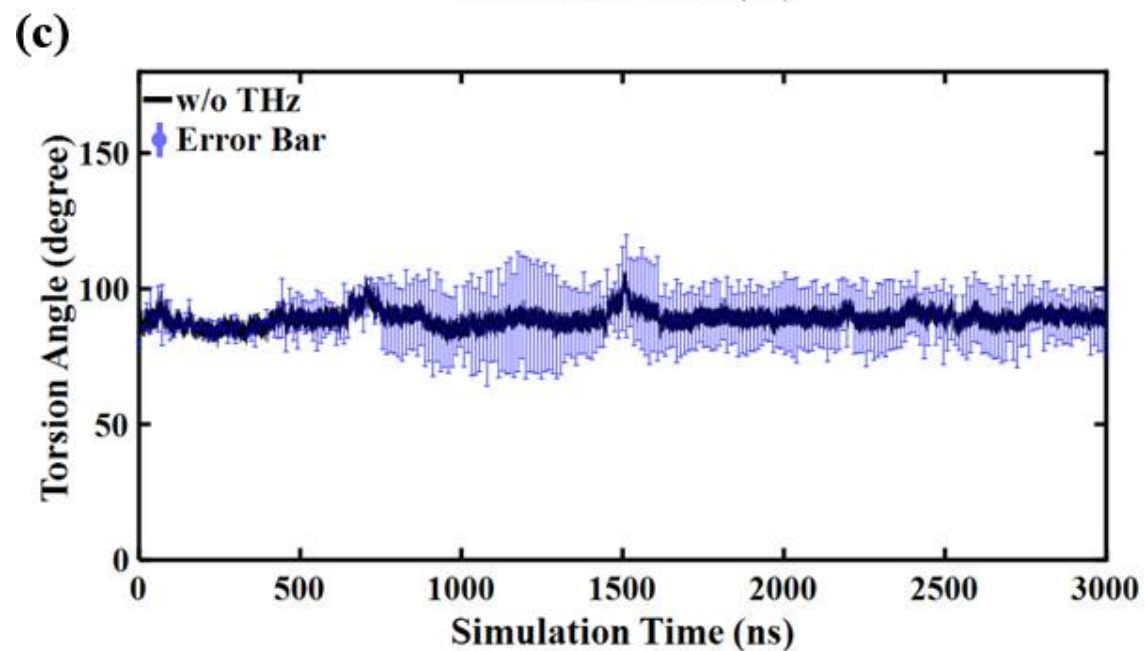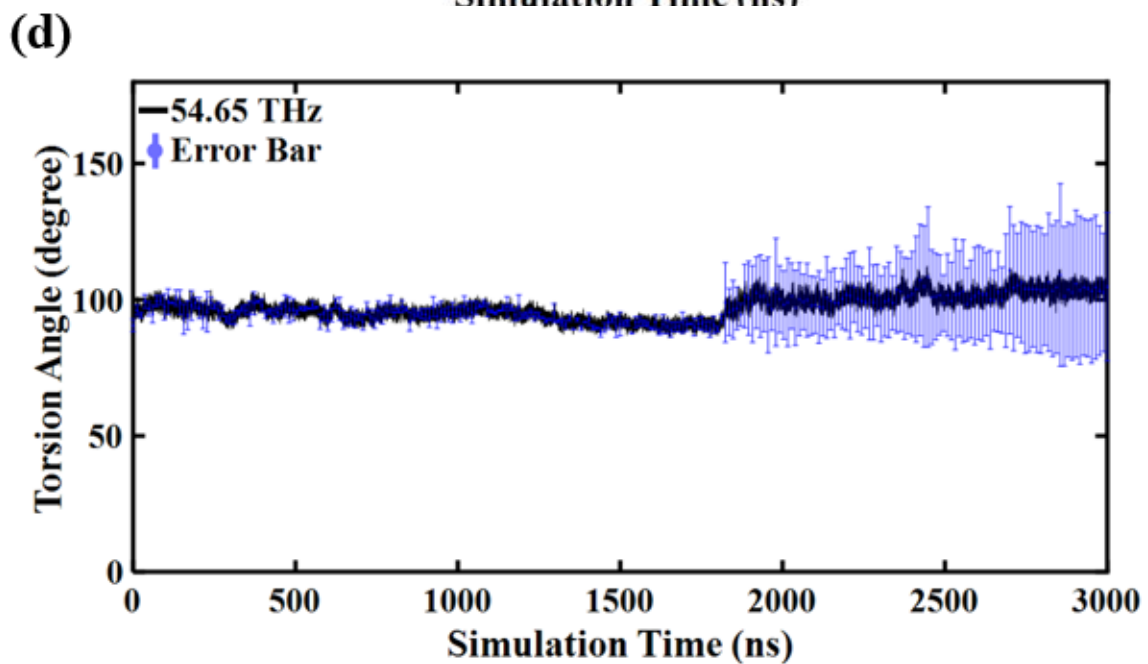

Supplement: d5cp03734d6.pdf [file d5cp03734d6.pdf]
